# Supplementary material
Source: PubMed Central journal article supplement (PMC9536245)
Supplement: NIHMS1742752-supplement-Supplementary_Table_S1.pdf [file NIHMS1742752-supplement-Supplementary_Table_S1.pdf]

## Supplementary Data

SUPPLEMENTARY TABLE S1. PRIMERS AND TAQMAN PROBES USED FOR PATHOGEN DETECTION AND PHYLOGENETIC ANALYSIS

| Pathogen                         | Target              | Primers/probe                                                | Product size (bp) | C/rxn (nM) | Conditions                                             | References             |
|----------------------------------|---------------------|--------------------------------------------------------------|-------------------|------------|--------------------------------------------------------|------------------------|
| <i>Anaplasma phagocytophilum</i> | <i>msp2/p44</i>     | p44-F: ATG GAA GGT AGT GTT GGT TAT GGT ATT                   | 77                | 300        | 3 min 95°C, (10 s 95°C + 45 s 60°C) × 40 cycles        | Graham et al. (2018)   |
|                                  |                     | p44-R: TTG GTC TTG AAG CGC TCG TA                            |                   | 300        |                                                        |                        |
|                                  |                     | p44-probe: HEX-TGG TGC CAG GGT TGA GCT TGA GAT TG-BHQ1       |                   | 200        |                                                        |                        |
| <i>Borrelia</i> spp.             | <i>msp4</i>         | msp4-F: TAT ATC CAA CTT CAA CTT CCA CTC                      | 93                | 300        |                                                        |                        |
|                                  |                     | msp4-R: CAT TCA AGT TCG CTA AGA GTT TAC                      |                   | 300        |                                                        |                        |
|                                  |                     | msp4-probe: HEX-CTC CGC CAA TAG CAT AGC CAG TTG-BHQ1         |                   | 200        |                                                        |                        |
|                                  |                     | 16S-F: AGC YTT TAA AGC TTC GCT TGT AG                        |                   | 600        |                                                        |                        |
| <i>Borrelia burgdorferi</i>      | <i>16S rDNA</i>     | 16S-R: GCC TCC CGT AGG AGT CTG G                             | 148               | 600        |                                                        |                        |
|                                  |                     | 16S-probe: FAM-CCG GCC TGA GAG GGT GAW CGG-BHQ1              |                   | 200        |                                                        |                        |
|                                  |                     | fliD-F: TGG TGA CAG AGT GTA TGA TAA TGG AA                   |                   | 400        |                                                        |                        |
| <i>Borrelia</i> spp.             | <i>16S-18S IGS</i>  | fliD-R: ACT CCT CCG GAA GCC ACA A                            | 78                | 400        |                                                        | Hojgaard et al. (2014) |
|                                  |                     | fliD-probe: FAM-TGC TAA AAT GCT AGG AGA TTG TCT GTC GCC-BHQ1 |                   | 200        |                                                        |                        |
|                                  |                     | IGS-F: CCTGAGGTCGGATGTTCAACTC                                |                   | 500        |                                                        |                        |
| <i>Borrelia</i> spp.             | <i>16S-23S</i>      | IGS-R: GCAAGCCGAGGGTCAAGG                                    | Bbss: 1030        | 500        | Rd 1: 2 min 95°C, (94°C 30 s + 63°C 30 s) × 34 cycles; | Bunikis et al. (2004)  |
|                                  |                     | Round 1: 80: GTA TGT TTA GTG AGG GGG GTG                     |                   | 500        |                                                        |                        |
|                                  |                     | 81: GGA TCA TAG CTC AGG TGG TTA G                            |                   | 500        |                                                        |                        |
| <i>Bartonella</i> spp.           | <i>tmRNA (ssrA)</i> | Round 2: 82: AGG GGG GTG AAG TCG TAA CAA G                   | 253               | 1000       | Rd 2: 2 min 95°C (94°C 30 s + 63°C 30 s) × 39 cycles   | Diaz et al. (2012)     |
|                                  |                     | 83: GTC TGA TAA ACC TGA GGT CGG A                            |                   | 1000       |                                                        |                        |
|                                  |                     | tmRNA-F: GCTATGGTAATAAATGGACAATGAAATAA                       |                   | 1000       |                                                        |                        |
| <i>Brucella</i> spp.             | <i>IS711</i>        | tmRNA-R: GCTTCTGTGGCAGGTG                                    | 63                | 200        | 2 min 95°C, (95°C 15 s + 60°C 60 s) × 45 cycles)       | Hinic et al. (2008)    |
|                                  |                     | tmRNA-probe: FAM-ACCCCGCTTAAACCTGCGCAGC-BHQ1                 |                   | 1000       |                                                        |                        |
|                                  |                     | IS711-F: GCTTGAAGCTTGGGACAGT                                 |                   | 1000       |                                                        |                        |
|                                  |                     | IS711-R: GGCCTACCGCTGCGAAT                                   |                   | 200        |                                                        |                        |
|                                  |                     | IS711-probe: HEX-AAGCCAAACACCCGGCCATTATGGT-BHQ1              |                   |            |                                                        |                        |

(continued)

SUPPLEMENTARY TABLE S1. (CONTINUED)

| Pathogen                                                                  | Target      | Primers/probe                                                                                  | Product size (bp) | C/rxn (nM) | Conditions                                                                                                                                    | References                               |
|---------------------------------------------------------------------------|-------------|------------------------------------------------------------------------------------------------|-------------------|------------|-----------------------------------------------------------------------------------------------------------------------------------------------|------------------------------------------|
| <i>Yersinia</i> spp.                                                      | <i>pal</i>  | pal-F: CGC AAA TAA TGA CCA ATC TGG                                                             | var               | 1000       | 3 min 95°C, (95°C 30 s + 66°C 30 s + 72°C 30 s) × 55 cycles);                                                                                 | Bai et al. (2017)                        |
|                                                                           |             | pal-R: CGT GGC CTT CAA CAA CAA C                                                               |                   | 1000       |                                                                                                                                               |                                          |
|                                                                           |             | pal-probe: Quasar 670 - CGG TTC TGA CTT CGC TCA AAT GCT GG-BHQ2                                |                   | 200        |                                                                                                                                               |                                          |
| <i>Bartonella</i> spp.                                                    | ITS         | 325f: CTTCAGATGATGATCCCAAGCCTTCTGGCG                                                           | 770               | 400        | Rd 1: 2 min 95°C, (95°C 30 s + 48°C 30 s + 72°C 2 min) × 40 cycles);<br>Rd 2: 2 min 95°C, (95°C 30 s + 55°C 30 s + 72°C 2 min) × 40 cycles).  | Diniz et al. (2007)                      |
|                                                                           |             | 1100r: GAACCGACGACCCCTGTGGCAAAGC                                                               |                   | 400        |                                                                                                                                               |                                          |
|                                                                           |             | 896f: GGC TAA TGA AGC AGT GAT AA                                                               |                   | 400        |                                                                                                                                               |                                          |
|                                                                           |             | 1233r: GCG ACG GTA TAC CCA TAG C                                                               |                   | 400        |                                                                                                                                               |                                          |
|                                                                           |             | Round 1:<br>443f: GCTATGTCTGCATTCATCA<br>1210r: GATCYTCAATCATTTCTTCCCA                         |                   | 400        |                                                                                                                                               |                                          |
| Round 2:<br>781f: GGGACCAAGCTCATGGTGG<br>1137r: AATGCCAAAAAGAACACAGTAAACA | 400         |                                                                                                |                   |            |                                                                                                                                               |                                          |
| <i>Yersinia pestis</i>                                                    | <i>pla</i>  | Yp1: ATCTTACTTTCGGTGAGAAG                                                                      | 480               | 400        | 5 min 95°C, (1 min 95°C + 1 min 56°C + 1 min 72°C) × 35 cycles, 10 min 72°C, 4°C                                                              | Hinnebusch and Schwan (1993)             |
|                                                                           |             | Yp2: CTTGGATGTTGAGCTTCCTA                                                                      |                   | 400        |                                                                                                                                               |                                          |
| <i>Rickettsia</i> spp.                                                    | <i>gltA</i> | CS-5: GAGAGAAAATTATATATCCAAATGTTGAT                                                            | 147               | 225        | Rd 1: 2 min 95°C, (95°C 20 s + 48°C 30 s + 60°C 2 min) × 35 cycles);<br>Rd 2: 10 min 95°C, (94°C 30 s + 55°C 30 s + 72°C 1 min) × 30 cycles). | Labruna et al. (2004)                    |
|                                                                           |             | CS-6: AGGGTCTTCGIGCATTTCTT                                                                     |                   | 225        |                                                                                                                                               |                                          |
| <i>Rickettsia</i> spp.                                                    | <i>gltA</i> | CS-5/6: FAM-CATTGTGCCATCCAGCCTACGGT-BHQ1                                                       | 381               | 150        | Rd 1: 2 min 95°C, (95°C 20 s + 48°C 30 s + 60°C 2 min) × 35 cycles);<br>Rd 2: 10 min 95°C, (94°C 30 s + 55°C 30 s + 72°C 1 min) × 30 cycles). | Lee et al. (2014), Regnery et al. (1991) |
|                                                                           |             | Round 1:<br>877f: GGG GGC CTG CTC ACG GCG G                                                    |                   | 400        |                                                                                                                                               |                                          |
|                                                                           |             | 1258r: ATT GC AAA AAG TAC AGT GAA CA                                                           |                   | 400        |                                                                                                                                               |                                          |
|                                                                           |             | Round 2:<br>896f: 5'- GGC TAA TGA AGC AGT GAT AA-3'<br>1233r: 5'- GCG ACG GTA TAC CCA TAG C-3' |                   | 400        |                                                                                                                                               |                                          |

## Supplementary References

- Bai Y, Urushadze L, Osikowicz L, McKee C, et al. Molecular survey of bacterial zoonotic agents in bats from the country of Georgia (Caucasus). PLoS One 2017; 12:e0171175.
- Birtles RJ, Raoult D. Comparison of partial citrate synthase gene (*gltA*) sequences for phylogenetic analysis of *Bartonella* species. Int J Syst Bacteriol 1996; 46:891–897.
- Bunikis J, Tsao J, Garpmo U, Berglund J, et al. Typing of *Borrelia* relapsing fever group strains. Emerg Infect Dis 2004; 10:1661–1664.
- Diaz MH, Bai Y, Malania L, Winchell JM, et al. Development of a novel genus-specific real-time PCR assay for detection and differentiation of *Bartonella* species and genotypes. J Clin Microbiol 2012; 50:1645–1649.
- Diniz PP, Maggi RG, Schwartz DS, Cadenas MB, et al. Canine bartonellosis: serological and molecular prevalence in Brazil and evidence of co-infection with *Bartonella henselae* and *Bartonella vinsonii* subsp. *berkhoffii*. Vet Res 2007; 38:697–710.
- Graham CB, Maes SE, Hojgaard A, Fleshman AC, et al. A molecular algorithm to detect and differentiate human pathogens infecting *Ixodes scapularis* and *Ixodes pacificus* (Acari: Ixodidae). Ticks Tick Borne Dis 2018; 9:390–403.
- Hinic V, Brodard I, Thomann A, Cvetnic Z, et al. Novel identification and differentiation of *Brucella melitensis*, *B. abortus*, *B. suis*, *B. ovis*, *B. canis*, and *B. neotomae* suitable for both conventional and real-time PCR systems. J Microbiol Methods 2008; 75:375–378.
- Hinnebusch J, Schwan TG. New method for plague surveillance using polymerase chain reaction to detect *Yersinia pestis* in fleas. J Clin Microbiol 1993; 31:1511–1514.
- Hojgaard A, Lukacik G, Piesman J. Detection of *Borrelia burgdorferi*, *Anaplasma phagocytophilum* and *Babesia microti*, with two different multiplex PCR assays. Ticks Tick Borne Dis 2014; 5:349–351.
- Labruna MB, Whitworth T, Horta MC, Bouyer DH, et al. *Rickettsia* species infecting *Amblyomma cooperi* ticks from an area in the state of Sao Paulo, Brazil, where Brazilian spotted fever is endemic. J Clin Microbiol 2004; 42:90–98.
- Lee S, Kakumanu ML, Ponnusamy L, Vaughn M, et al. Prevalence of *Rickettsiales* in ticks removed from the skin of outdoor workers in North Carolina. Parasit Vectors 2014; 7:607.
- Norman AF, Regnery R, Jameson P, Greene C, et al. Differentiation of *Bartonella*-like isolates at the species level by PCR-restriction fragment length polymorphism in the citrate synthase gene. J Clin Microbiol 1995; 33:1797–1803.
- Regnery RL, Spruill CL, Plikaytis BD. Genotypic identification of rickettsiae and estimation of intraspecies sequence divergence for portions of two rickettsial genes. J Bacteriol 1991; 173:1576–1589.
